# Supplementary material for: Dual modal in vivo imaging using upconversion luminescence and enhanced computed tomography properties
Source: Royal Society of Chemistry journal article supplement (doi:10.1039/c1nr10736d), 2011-01-01
Supplement: c1nr10736d.pdf [file c1nr10736d.pdf]

## Supplementary Information (ESI)

# Dual Modal *in Vivo* Imaging Using Upconversion Luminescence and Enhanced Computed Tomography Properties

Guo Zhang,<sup>ab</sup> Yanlan Liu,<sup>ab</sup> Qinghai Yuan,<sup>\*c</sup> Chenghua Zong,<sup>ab</sup> Jianhua Liu,<sup>c</sup> and

Lehui Lu<sup>\*a</sup>

a State Key Laboratory of Electroanalytical Chemistry, Changchun Institute of Applied Chemistry, Chinese Academy of Sciences, Changchun, P. R. China. Fax: +86-43185262406; Tel: +86-43185262418; E-mail: lehuilu@ciac.jl.cn

b Graduate School, Chinese Academy of Sciences, Beijing, P. R. China.

c Department of Radiology, the Second Hospital of Jilin University Norman Bethune, Changchun, P. R. China; E-mail: yuanqinghai123@sina.com

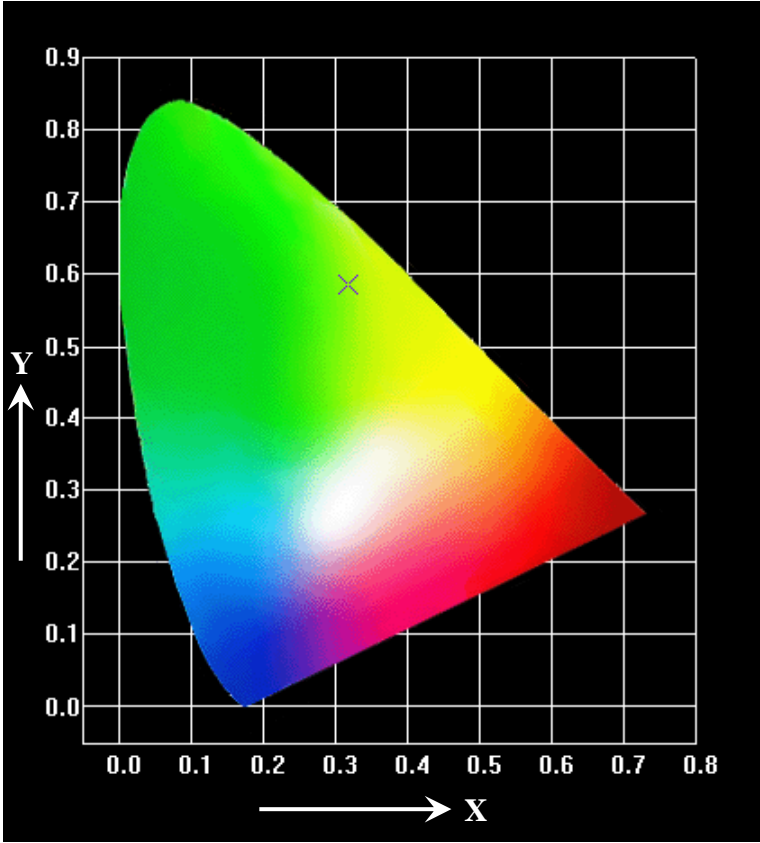

Figure S1. CIE chromaticity diagram showing the emission colors for  $\text{Yb}^{3+}/\text{Er}^{3+}$  doped in  $\beta\text{-NaYF}_4$  nanoparticles.

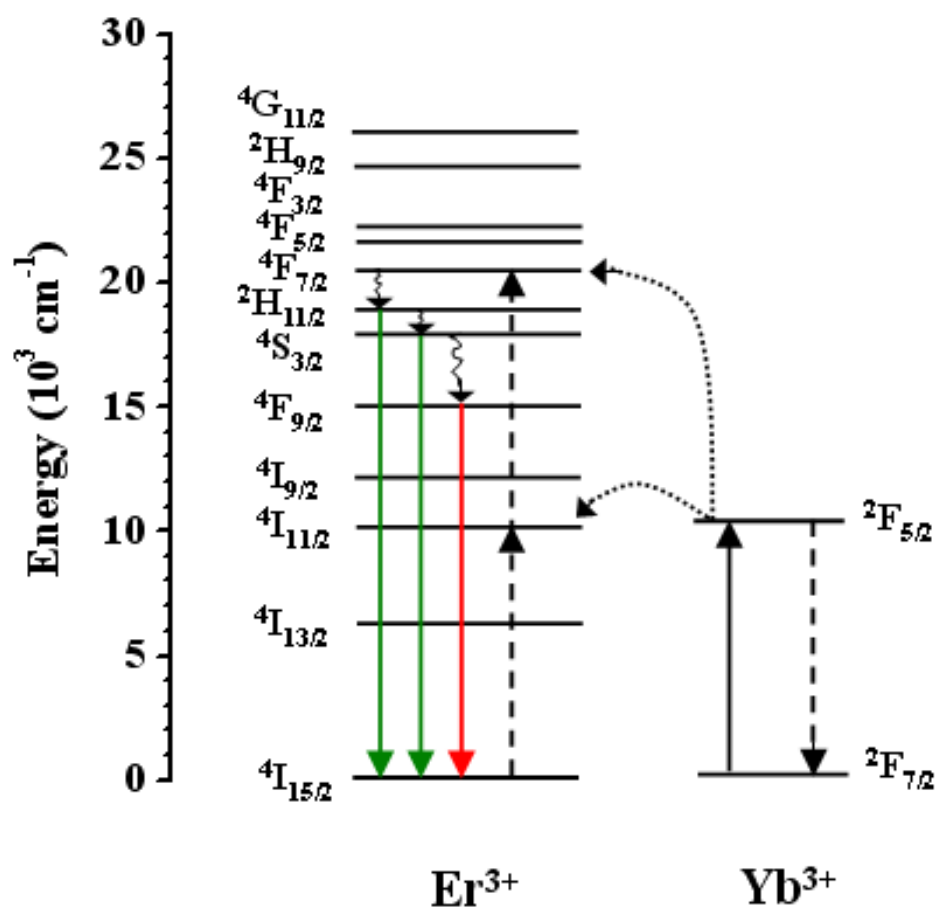

Figure S2. Schematic representation of the energy-level and upconversion luminescence process for  $\text{Yb}^{3+}/\text{Er}^{3+}$  doped in  $\beta\text{-NaYF}_4$  nanoparticles. The full, dotted, dashed, and curly arrows indicate emission, nonradiative energy transfer, cross-relaxation and multiphonon relaxation processes, respectively.

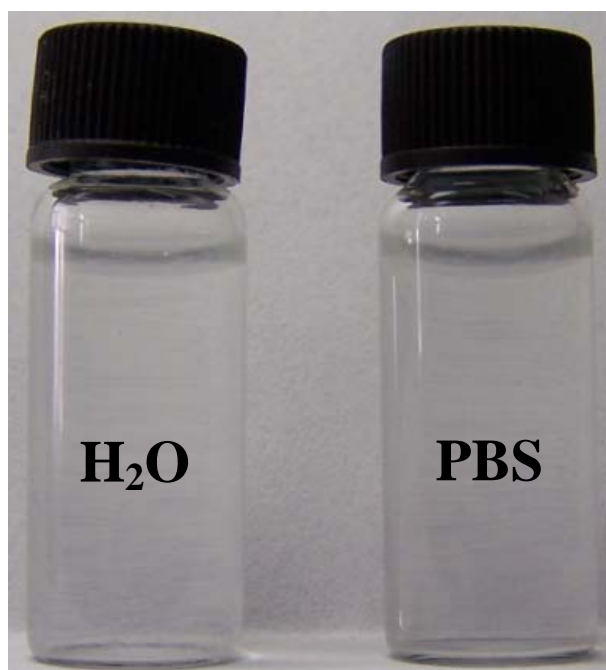

Figure S3. Photographs of UCNPs@SiO<sub>2</sub>-NH<sub>2</sub>/I-PEG nanoprobe solution dispersed in H<sub>2</sub>O and PBS (0.01M, pH = 7.4), respectively.
